# Supplementary material
Source: HighWire-hosted journal article supplement (https://gh.bmj.com/content/5/9/e002471)

Figure A: Use of any psychiatric care during time of follow-up among female migrants to Sweden by year of immigration, compared with Swedish born.

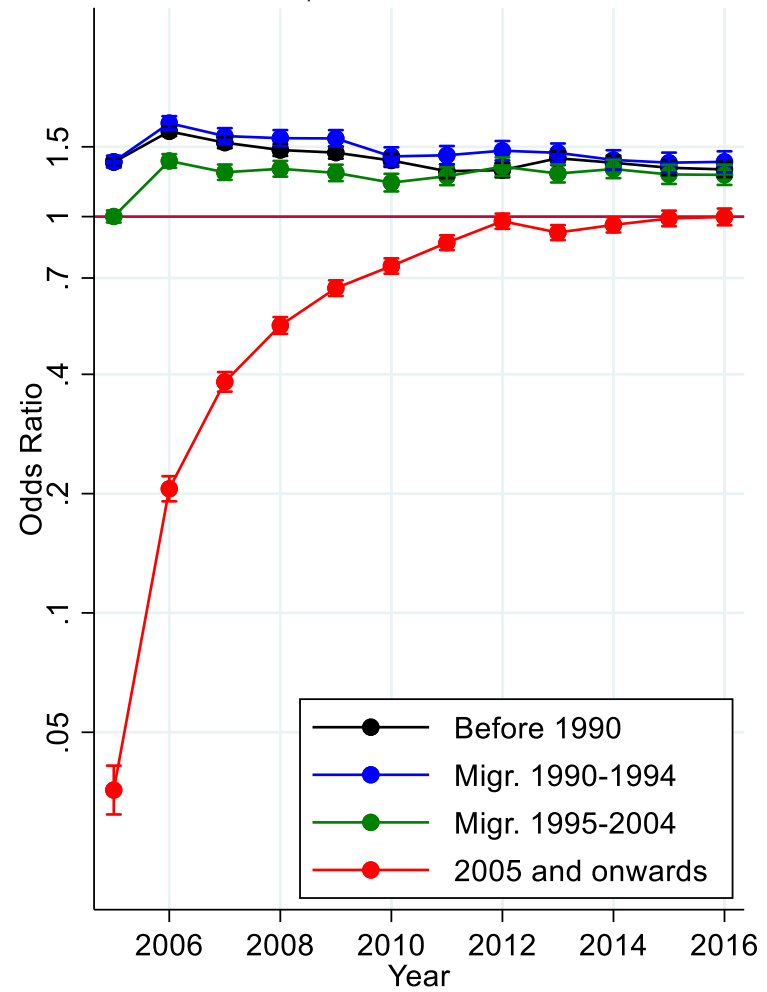

Figure B: Use of any psychiatric care during time of follow-up among male migrants to Sweden by year of immigration, compared with Swedish born.

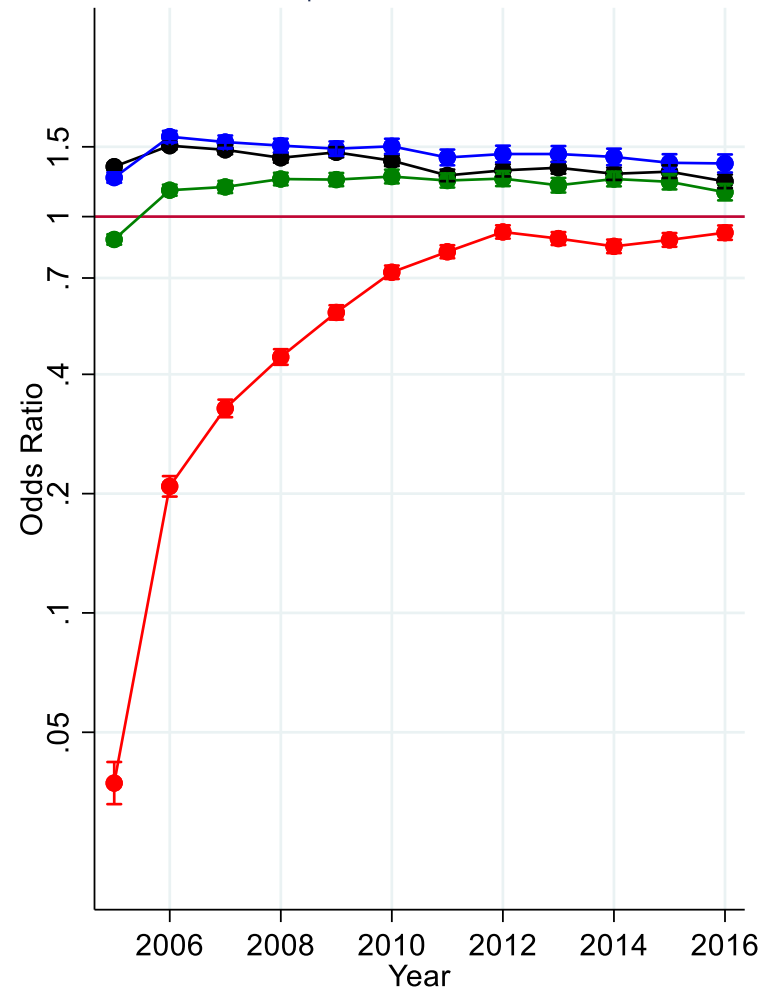

Figure C: Any psychiatric care during time of follow-up among female migrants to Sweden by region of origin, compared to Swedish born.

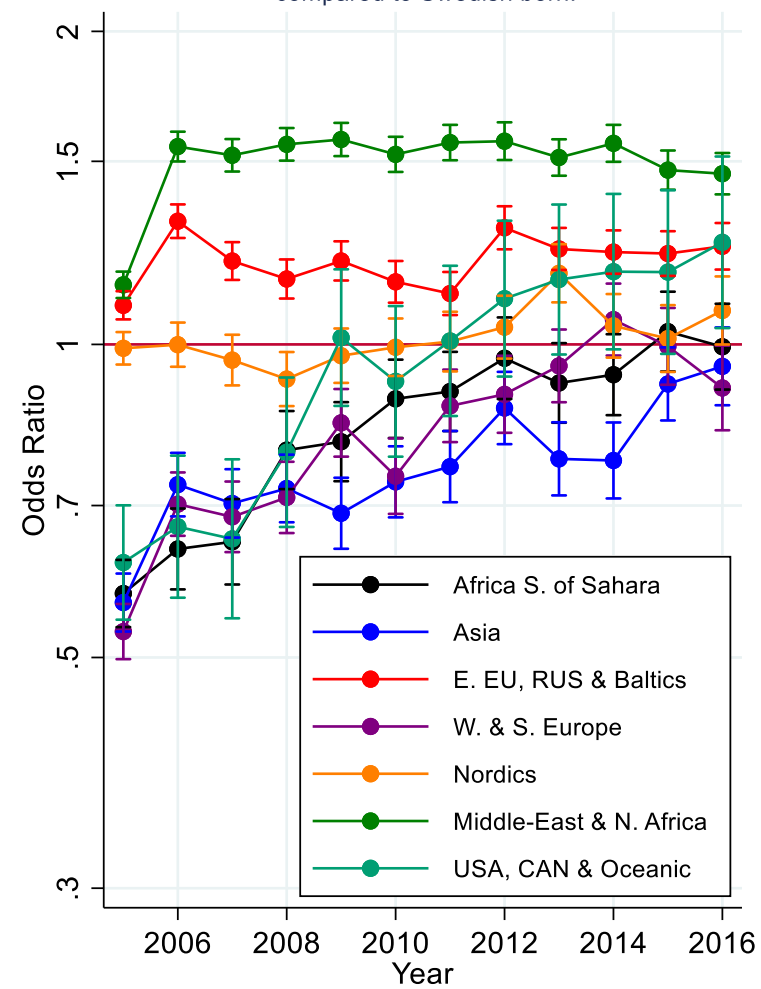

Figure D: Any psychiatric care during time of follow-up among male migrants to Sweden by region of origin, compared to Swedish born.

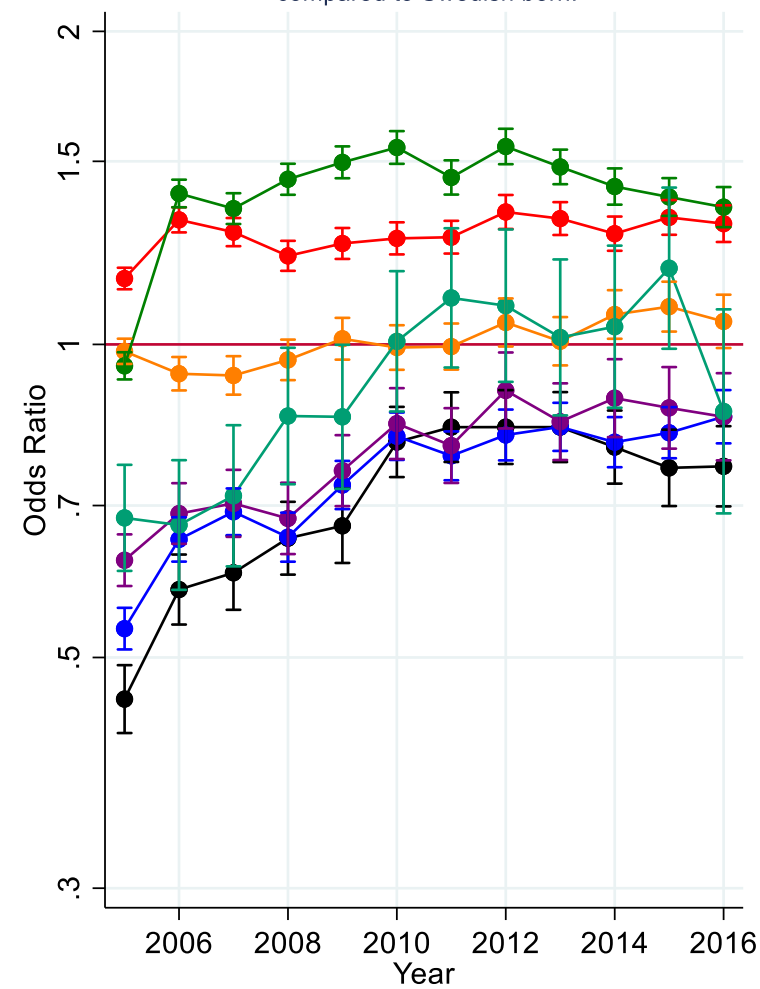

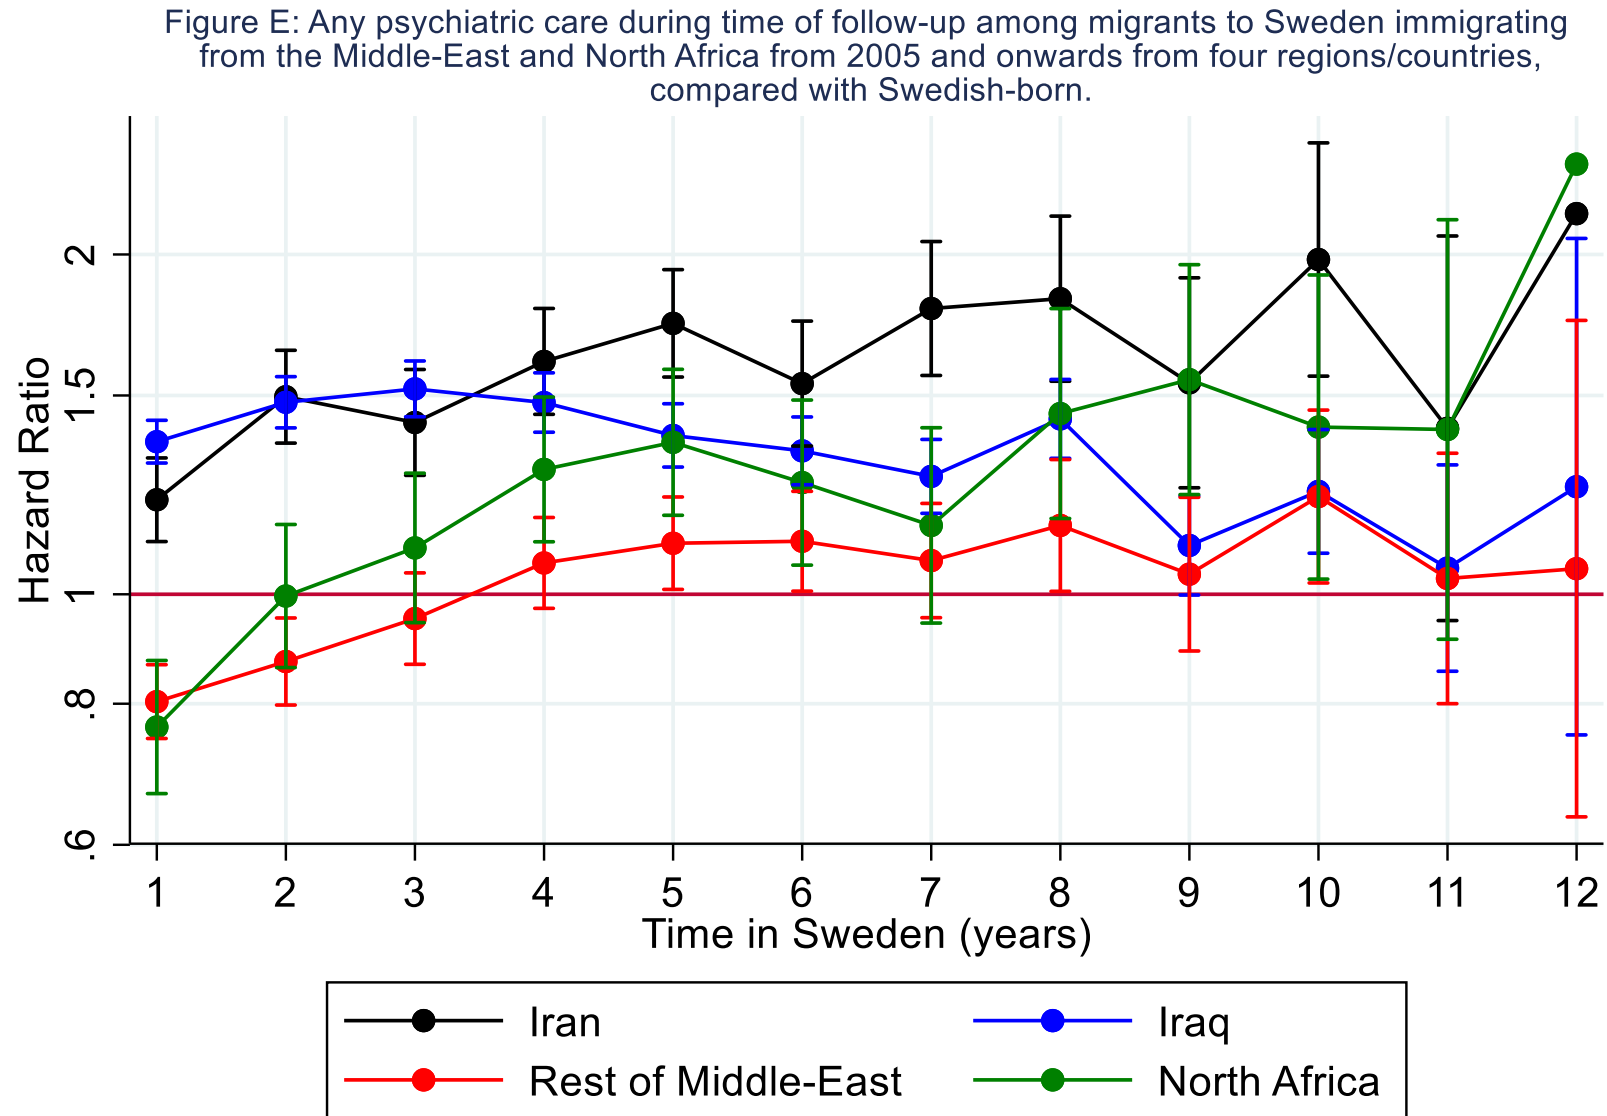

Supplement: inline-supplementary-material-1 [file inline-supplementary-material-1.pdf]
